# Supplementary material for: Evaluation of the effect of prebiotic sesame candies on loperamide-induced constipation in mice
Source: Royal Society of Chemistry journal article supplement (doi:10.1039/d2fo00067a), 2022-01-01
Supplement: d2fo00067a1.pdf [file d2fo00067a1.pdf]

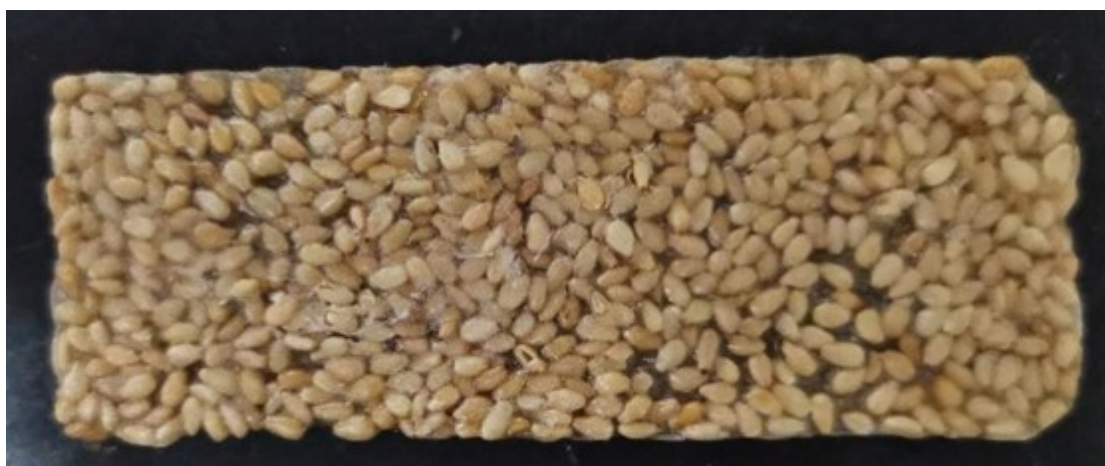

**Supplementary Fig. S1.** Picture of prebiotic sesame candies

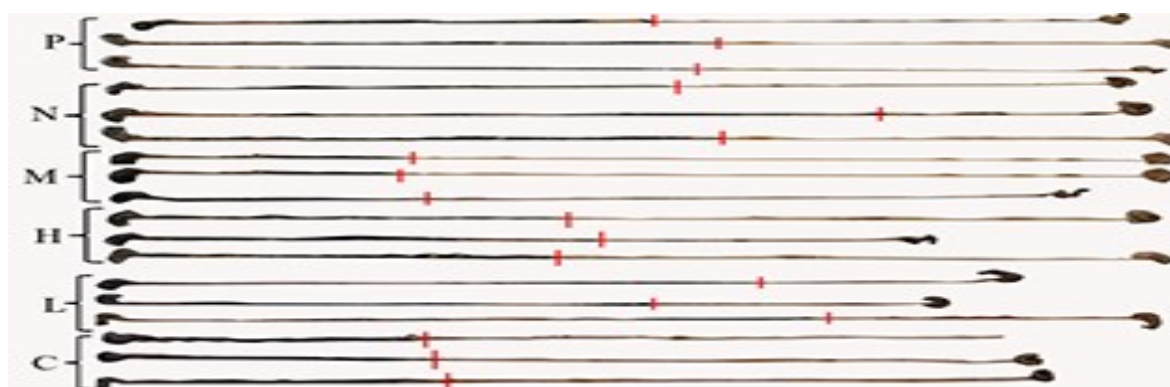

**Supplementary Fig. S2** The propulsion length of ink in small intestine of mice. N: the normal control group; P: normal mice treated with 10 mg kg<sup>-1</sup> Maren Runchuang Wan; C: normal mice treated with low dose of Commercial sesame candy; L: normal mice treated with low dose of Prebiotics sesame candy (12.5%); M: the Loperamide-induced model mice group; H: normal mice treated with high dose of Prebiotics sesame candy (25%).

**Supplementary Table S1.** Prebiotics sesame candies improved black fecal parameters in mice.

| Group | Time to the first black stool defecation (min) | Fecal weight (mg)          | Fecal number (n/5h)      |
|-------|------------------------------------------------|----------------------------|--------------------------|
| N     | 131.40±8.99                                    | 72.00±8.37                 | 8.80±2.59                |
| M     | 239.00±18.06 <sup>###</sup>                    | 33.33±11.18 <sup>###</sup> | 2.11±1.17 <sup>###</sup> |
| C     | 169.67±5.47 <sup>***</sup>                     | 48.33±11.69 <sup>ns</sup>  | 3.83±1.17 <sup>ns</sup>  |
| L     | 144.00±7.62 <sup>***</sup>                     | 66.67±36.70 <sup>**</sup>  | 5.67±1.89 <sup>***</sup> |
| H     | 176.56±7.43 <sup>***</sup>                     | 46.67±20.62 <sup>ns</sup>  | 4.22±1.30 <sup>*</sup>   |
| P     | 143.88±5.06 <sup>***</sup>                     | 61.25±11.26 <sup>**</sup>  | 5.88±0.99 <sup>***</sup> |

Data were represented as mean ± standard deviation (SD) (n=10). (\*)  $p < 0.05$ , (\*\*)  $p < 0.01$ , (\*\*\*)  $p < 0.001$ , compared with the Loperamide-induced model mice group; (#)  $p < 0.05$ , (##)  $p < 0.01$ , (###)  $p < 0.001$ , compared with the normal control group; ns, not significant.
